# Supplementary material for: Comprehensive analysis of the microbiome and metabolome in pus from pyogenic liver abscess patients with and without diabetes mellitus
Source: Front Microbiol. 2023 Jun 23;14:1211835. doi: 10.3389/fmicb.2023.1211835 (PMC10328747; doi:10.3389/fmicb.2023.1211835)
Supplement: Supplementary file 1 [file Table_1.xlsx]

## Sheet: Supplementary Table S1
Conventional culture results and 16SrDNA sequencing results at the genus level of the 62 pus samples
Samples	Conventional culture results	16SrDNA sequencing results at the genus level(%)	defined as monomicrobial infection with reads number greater than 96%
LA1	No growth	Klebsiella(98.46)
LA2	Klebsiella pneumoniae	Klebsiella（98.51）
LA3	Klebsiella pneumoniae	Klebsiella（58.54）,Stenotrophomonas（5.05）,Chloroflexi_unclassified（1.16）,Anaerolineaceae_unclassified（1.07）,Acinetobacter（0.94）
LA4	Klebsiella pneumoniae	Klebsiella（96.65）
LA5	Mixed culture	Prevotella_7（36.59）,Streptococcus（16.60）,Proteus（11.58）,Escherichia-Shigella（9.41）,Fusobacterium（7.65）
LA6	Klebsiella pneumoniae	Klebsiella（98.86）
LA7	No growth	Klebsiella（98.69）
LA8	Klebsiella pneumoniae;Enterococcus faecium	Stenotrophomonas（14.61）,Sva0485_unclassified（2.69）,Gemmatimonadaceae_unclassified（2.43）,SJA-15_unclassified（2.14）,Chloroflexi_unclassified（1.85）
LA9	Klebsiella pneumoniae	Klebsiella（94.77）,Brevundimonas（0.95）,Brevundimonas（0.63）,Actinobacteria_unclassified（0.32）,Jeotgalicoccus（0.29）
LA10	Klebsiella pneumoniae	Klebsiella（97.48）
LA11	Klebsiella pneumoniae	Klebsiella（99.39）
LA12	Enterococcus faecium	Enterococcus（98.67）
LA13	Uncultured	Klebsiella（98.75）
LA14	Klebsiella pneumoniae	Klebsiella（98.75）
LA15	Klebsiella pneumoniae	Klebsiella（98.58）
LA16	Klebsiella pneumoniae	Klebsiella（98.81）
LA17	Pseudomonas aeruginosa	Klebsiella（90.03）,Acinetobacter（2.32）,Burkholderia-Caballeronia-Paraburkholderia（0.72）,Brevundimonas（0.50）,Bacteroides（0.46）
LA18	Escherichia coli	Bacteroides（71.32）,Olsenella（7.97）,Escherichia-Shigella（4.14）,Eggerthella（3.72）,Streptococcus（3.24）
LA19	Klebsiella pneumoniae	Klebsiella（98.73）
LA20	Klebsiella pneumoniae	Klebsiella（99.02）
LA21	Klebsiella pneumoniae	Klebsiella（92.86）,Brevundimonas（1.30）,Sphingomonas（0.60）,Pseudomonas（0.50）,Corynebacterium（0.31）,Acinetobacter（0.31）
LA22	Klebsiella pneumoniae	Klebsiella（98.89）
LA23	Klebsiella pneumoniae	Klebsiella（99.09）
LA24	Mixed culture	Klebsiella（98.98）
LA25	Klebsiella pneumoniae	Klebsiella（88.41）,Escherichia-Shigella（0.86）,Muribaculaceae_unclassified（0.71）,Faecalibacterium（0.55）,Lactobacillus（0.50）
LA26	Klebsiella pneumoniae	Klebsiella（90.59）,Faecalibacterium（0.68）,Escherichia-Shigella（0.61）,Lactobacillus（0.50）,Ligilactobacillus（0.44）
LA27	Klebsiella pneumoniae	Klebsiella（88.42）,Faecalibacterium（0.94）,Muribaculaceae_unclassified（0.84）,Escherichia-Shigella（0.72）,Lactobacillus（0.58）
LA28	Klebsiella pneumoniae	Acidovorax（30.64）,Citrobacter（22.81）,Renibacterium（11.55）,Caulobacter（10.53）,Sphingopyxis（9.59）
LA29	Klebsiella pneumoniae	Klebsiella（89.55）,Lactobacillus（0.66）,Faecalibacterium（0.64）,Muribaculaceae_unclassified（0.55）,Ligilactobacillus（0.40）
LA30	No growth	Klebsiella（90.11）,Ligilactobacillus（0.63）,Lactobacillus（0.63）,Muribaculaceae_unclassified（0.57）,Faecalibacterium（0.45）
LA31	Uncultured	Klebsiella（83.28）,Faecalibacterium（0.84）,Ligilactobacillus（0.83）,Pseudomonas（0.80）,Escherichia-Shigella（0.79）
LA32	Klebsiella pneumoniae	Klebsiella（89.06）,Escherichia-Shigella（0.60）,Faecalibacterium（0.58）,Muribaculaceae_unclassified（0.56）,Lactobacillus（0.53）
LA33	Uncultured	Klebsiella（93.11）,Muribaculaceae_unclassified（0.37）,Lactobacillus（0.37）,Escherichia-Shigella（0.29）,Faecalibacterium（0.29）
LA34	Enterococcus faecium ;Enterobacter cloacae subspecies	Enterococcus（64.93）,Klebsiella（19.34）,Enterobacterales_unclassified（5.77）,Enterobacter（1.91）,Faecalibacterium（0.64）
LA35	Uncultured	Klebsiella（75.49）,Sphingomonas（4.78）,Acidovorax（3.98）,Citrobacter（3.87）,Faecalibacterium（0.72）
LA36	Streptococcus intermadius	Streptococcus（91.73）,Acidovorax（3.29）,Citrobacter（1.38）,Ralstonia（1.22）,Blastomonas（0.74）
LA37	Klebsiella pneumoniae	Klebsiella（27.18）,Pseudomonas（8.23）,Citrobacter（5.75）,Acidovorax（3.87）,Faecalibacterium（3.43）
LA38	No growth	Klebsiella（58.81）,Lactobacillus（2.83）,Faecalibacterium（2.54）,Muribaculaceae_unclassified（2.25）,Ligilactobacillus（1.98）
LA39	Uncultured	Klebsiella（93.19）,Faecalibacterium（0.67）,Escherichia-Shigella（0.39）,Ligilactobacillus（0.38）,Muribaculaceae_unclassified（0.36）
LA40	Klebsiella pneumoniae	Klebsiella（70.79）,Faecalibacterium（1.83）,Lactobacillus（1.57）,Escherichia-Shigella（1.40）,Muribaculaceae_unclassified（1.27）
LA41	Klebsiella pneumoniae	Klebsiella（84.53）,Sphingomonas（1.28）,Faecalibacterium（0.96）,Lactobacillus（0.92）,Muribaculaceae_unclassified（0.81）
LA42	Klebsiella pneumoniae	Klebsiella（90.43）,Faecalibacterium（0.92）,Lactobacillus（0.69）,Muribaculaceae_unclassified（0.42）,Bacteroides（0.37）
LA43	Uncultured	Klebsiella（86.06）,Faecalibacterium（1.16）,Muribaculaceae_unclassified（0.81）,Muribaculaceae_unclassified（0.79）,Bifidobacterium（0.50）
LA44	Uncultured	Klebsiella（85.48）,Muribaculaceae_unclassified（0.94）,Lactobacillus（0.93）,Faecalibacterium（0.87）,Ligilactobacillus（0.82）
LA45	Uncultured	Klebsiella（95.85）,Acidovorax（1.10）,Pseudomonas（0.61）,Caulobacter（0.38）,Ralstonia（0.24）
LA46	Klebsiella pneumoniae	Klebsiella（99.58）
LA47	Uncultured	Citrobacter（30.69）,Klebsiella（29.78）,Acidovorax（25.26）,Caulobacter（4.76）,Ferrovibrionales_unclassified（3.92）
LA48	Klebsiella pneumoniae	Klebsiella（99.47）
LA49	Escherichia coli	Bacteroides（60.23）,Escherichia-Shigella（39.42）,Klebsiella（0.09）,Acidovorax（0.06）,Burkholderia-Caballeronia-Paraburkholderia（0.03）
LA50	Klebsiella pneumoniae	Klebsiella（99.17）
LA51	Klebsiella pneumoniae	Klebsiella（54.80）,Acidovorax（21.33）,Ferrovibrionales_unclassified（2.98）,Acinetobacter（2.60）,Citrobacter（2.15）
LA52	Uncultured	Klebsiella（99.07）
LA53	Klebsiella pneumoniae	Klebsiella（91.56）,Faecalibacterium（0.71）,Lactobacillus（0.59）,Muribaculaceae_unclassified（0.37）,Arthrobacter（0.36）
LA54	No growth	Serratia（9.10）,Burkholderia-Caballeronia-Paraburkholderia（7.88）,Klebsiella（7.46）,Acidovorax（6.88）,Pseudomonas（4.91）
LA55	Klebsiella pneumoniae	Klebsiella（82.62）,Bradyrhizobium（9.75）,Faecalibacterium（0.58）,Ligilactobacillus（0.47）,Lactobacillus（0.42）
LA56	Uncultured	Klebsiella（99.58）
LA57	Klebsiella pneumoniae	Klebsiella（45.33）,Acidovorax（27.42）,Citrobacter（19.22）,Caulobacter（2.32）,Bosea（2.27）
LA58	Klebsiella pneumoniae	Klebsiella（76.34）,Pseudomonas（2.98）,Acidovorax（1.87）,Faecalibacterium（1.17）,Lactobacillus（0.94）
LA59	Klebsiella pneumoniae	Klebsiella（90.19）,Faecalibacterium（0.79）,Muribaculaceae_unclassified（0.61）,Lactobacillus（0.53）,Ligilactobacillus（0.44）
LA60	Klebsiella pneumoniae	Acidovorax（36.62）,Citrobacter（29.80）,Ferrovibrionales_unclassified（11.87）,Klebsiella（10.37）,Acinetobacter（2.06）
LA61	Klebsiella pneumoniae	Klebsiella（63.25）,Citrobacter（10.77）,Acidovorax（8.02）,Ferrovibrionales_unclassified（1.45）,Renibacterium（1.29）
LA62	Klebsiella pneumoniae	Klebsiella（91.18）,Acidovorax（0.72）,Faecalibacterium（0.67）,Muribaculaceae_unclassified（0.57）,Ligilactobacillus（0.42）
